# Supplementary material for: Metagenomic analysis revealed the potential role of gut microbiome in gout
Source: PubMed Central journal article supplement (PMC8352958; doi:10.1038/s41522-021-00235-2), 2021-08-09
Supplement: 41522_2021_235_MOESM1_ESM.pdf [file 41522_2021_235_MOESM1_ESM.pdf]

1 **Metagenomic analysis revealed the potential role of gut microbiome in gout**

2  
3 Supplementary document  
4

5 **Supplementary Methods**

6 **DNA library construction**

7 1.5 µg DNA was fragmented by Covaris E210 (Covaris, USA). The fragmented DNAs were  
8 tested by Gel-Electrophotometric. The fragmented DNAs were combined with End Repair Mix,  
9 incubated at 20 °C for 30 min. The end-repaired DNA was purified with QIAquick PCR  
10 Purification Kit (QIAGEN, Germany), then A-Tailing Mix was added and incubated at 37 °C  
11 for 30 min. The purified Adenylate 3'-Ends DNA was combined Adapter and Ligation Mix,  
12 incubated the ligation reaction at 20 °C for 15 min. Adapter-ligated DNA was selected by  
13 running a 2% agarose gel to recover the target fragments. The gel was purified with QIAquick  
14 Gel Extraction Kit (QIAGEN, Germany). Several rounds of PCR amplification with PCR  
15 Primer Cocktail and PCR Master Mix were performed to enrich the Adapter-ligated DNA  
16 fragments. Then the PCR products were selected by running 2% agarose gel to recover the  
17 target fragments. The gel was purified with QIAquick Gel Extraction Kit (QIAGEN, Germany).

18

19 **Supplementary Data 1. The supplementary data 1 contains below information as data**  
20 **tables.**

21 Supplementary Table 1. Phenotype of all participants.

22 Supplementary Table 2. Alterations in clinical characteristics after drug treatment in gout  
23 patients.

24 Supplementary Table 3. Gout associated phyla.

25 Supplementary Table 4. Gout associated genera.

26 Supplementary Table 5. Gout associated species.

27 Supplementary Table 6. Gout associated taxa detected by MetaPhlAn3.

28 Supplementary Table 7. Gout associated KOs.

29 Supplementary Table 8. Gout associated pathways and modules.

30 Supplementary Table 9. Spearman's rank correlation between Urate degradation-associated  
31 KOs and genera.

32 Supplementary Table 10. Urate degradation-associated species in KEGG database.

33 Supplementary Table 11. PERMANOVA for the influence of gout. Bray Curtis distance and  
34 9,999 permutations.

35 Supplementary Table 12. The 3 gene markers was identified to discriminate healthy controls  
36 and gout patients base on a random forest model.

37 Supplementary Table 13. The probability of gout was predicted in discovery samples and  
38 validation cohort according to the 3 microbial gene biomarkers selected by random forest  
39 model.

40 Supplementary Table 14. Dietary pattern of the discovery cohort.

41 Supplementary Table 15. Data production, quality control and IGC database alignment.

42 **Supplementary figures**

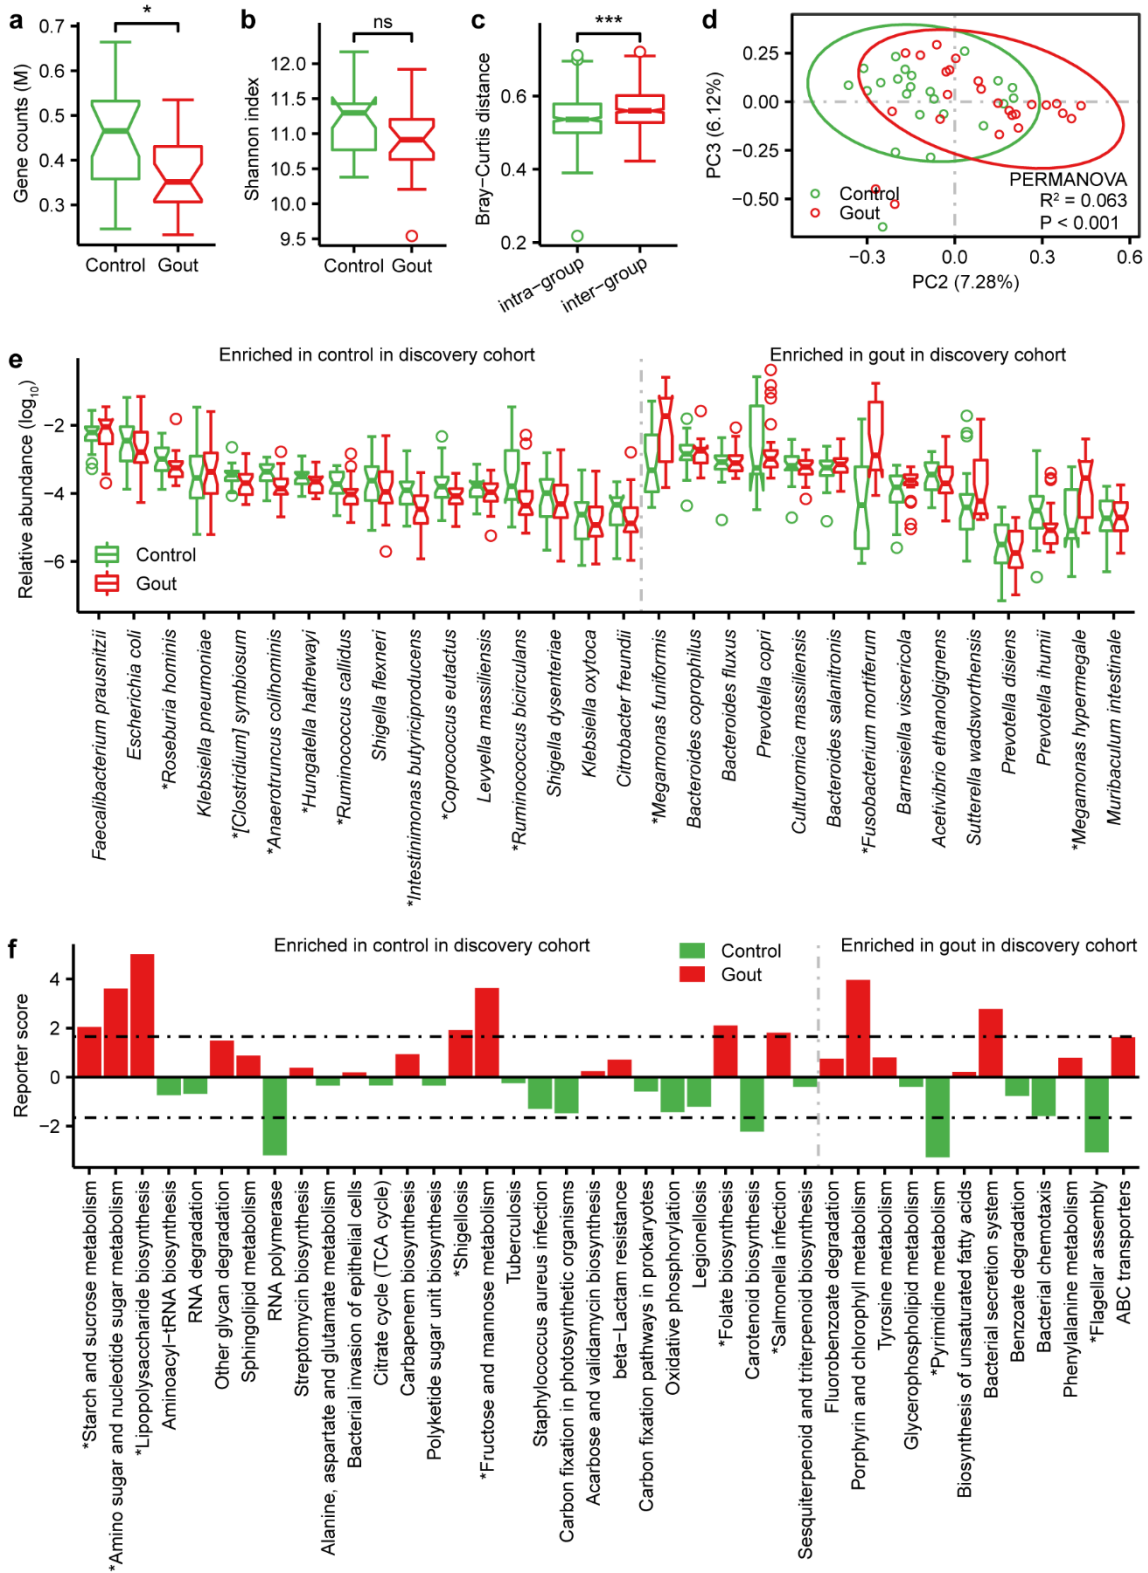

43

44 **Supplementary Figure 1.** The alpha and beta diversity, differential species and pathways in  
 45 validation cohort. **(a)** Box and whisker plot of gene count in the healthy controls and gout  
 46 patients. **(b, c)** Box and whisker plots of alpha diversity (Shannon index) and beta diversity  
 47 (Bray-Curtis distance) at the gene level. Wilcoxon rank-sum test was used to determine

48 significance. '\*' denotes  $P < 0.05$ ; '\*\*' denotes  $P < 0.01$ ; ns denotes no significant. **(d)** Principal  
49 component analysis (PCA) based on the gene abundance profile. **(e)** The relative abundance of  
50 bacterial species which showed in Figure 1i in validation cohort. '\*' denotes species with  $P <$   
51  $0.05$  in both discovery and validation cohort. **(f)** Reporter score of pathways in validation  
52 cohort. '\*' denotes pathways with  $|\text{reporter score}| > 1.65$  both in discovery and validation cohort.  
53 For all box and whisker plots, the center line represents median. The bounds of box represent  
54 the first and third quartiles. The upper whisker extends from the hinge to the largest value no  
55 further than  $1.5 * \text{interquartile range (IQR)}$  from the hinge. The lower whisker extends from  
56 the hinge to the smallest value at most  $1.5 * \text{IQR}$  of the hinge. The notch represents a confidence  
57 interval around the median as the median  $\pm 1.58 * \text{IQR} / \sqrt{n}$ .

58

59

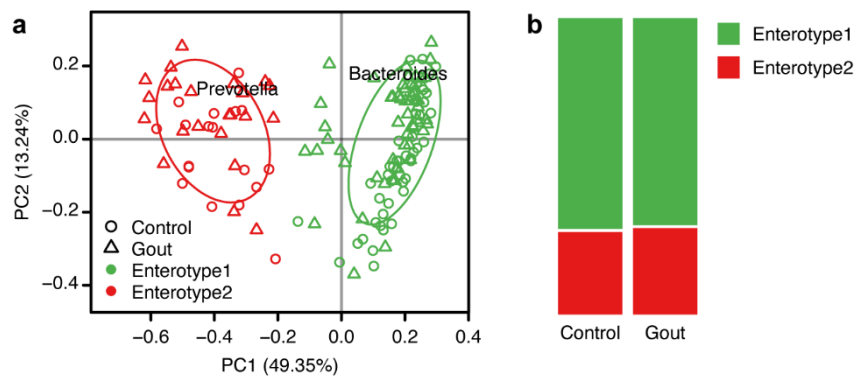

60

61 **Supplementary Figure 2.** Identification of gut enterotypes in gout patients and healthy  
62 controls. **(a)** Two enterotypes were identified by PCA at the genus level. Predominant genera  
63 in enterotype1 and enterotype2 were *Bacteroides* and *Prevotella*, respectively. **(b)** Distribution  
64 of enterotypes in gout patients and healthy controls.  $P = 0.8541$ , fisher's exact test.

65

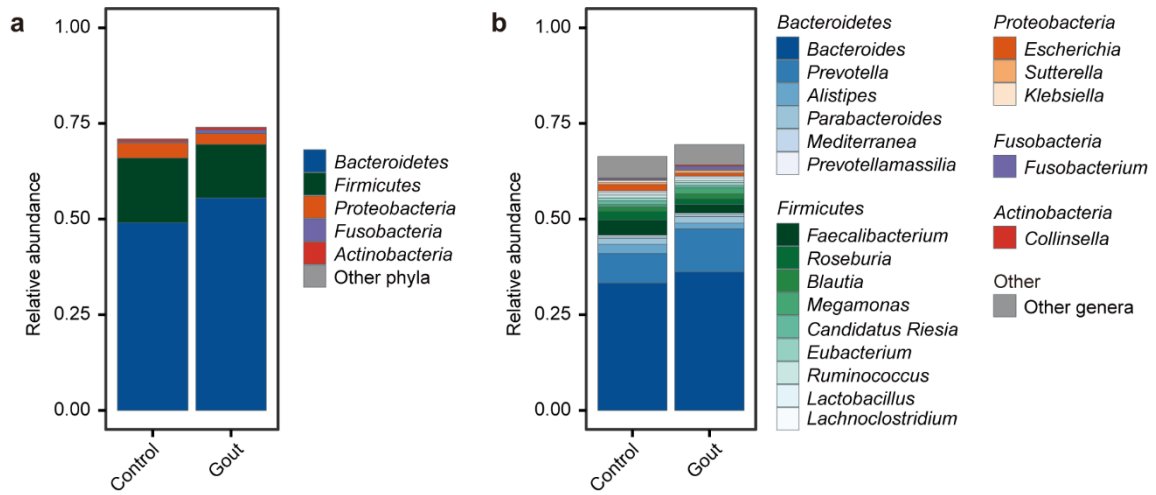

66

67 **Supplementary Figure 3.** Gut microbial composition of gout patients and healthy controls.

68 The relative abundance of major phyla **(a)** and genera **(b)** were shown and the unclassified taxa  
 69 were not included.

70

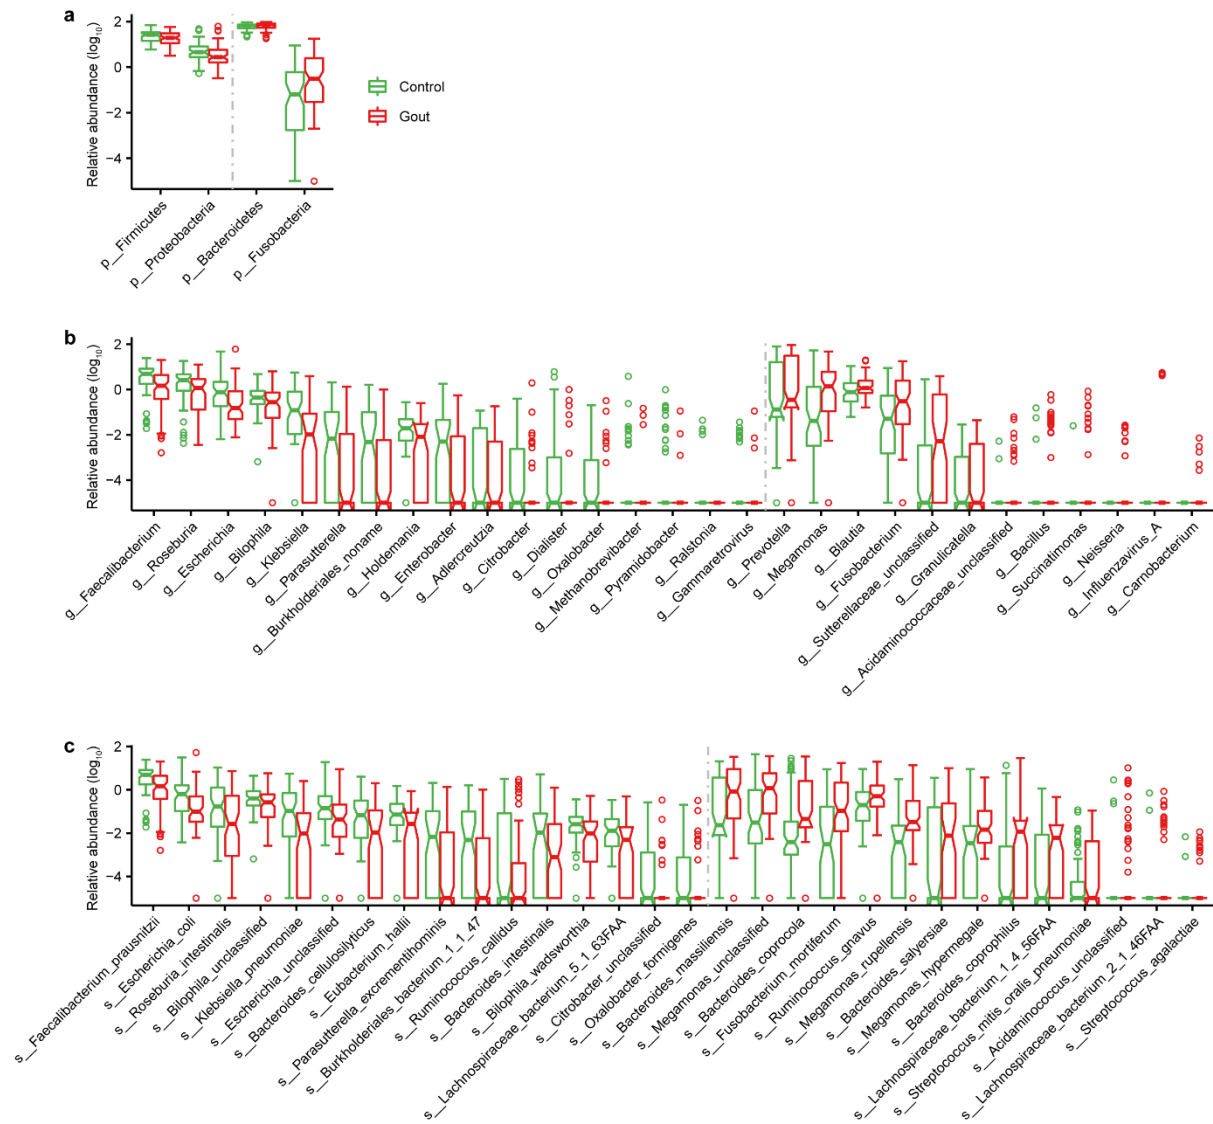

71

72 **Supplementary Figure 4.** The top 4, 30 and 30 differentially abundant **(a)** phylum-, **(b)** genus-

73 and **(c)** species-level taxa between gout and controls as obtained using MetaPhlan3 analysis.

74 For all box and whisker plots, the center line represents median. The bounds of box represent

75 the first and third quartiles. The upper whisker extends from the hinge to the largest value no

76 further than  $1.5 * \text{interquartile range (IQR)}$  from the hinge. The lower whisker extends from

77 the hinge to the smallest value at most  $1.5 * \text{IQR}$  of the hinge. The notch represents a confidence

78 interval around the median as the median  $\pm 1.58 * \text{IQR} / \sqrt{n}$ .

79

80

81

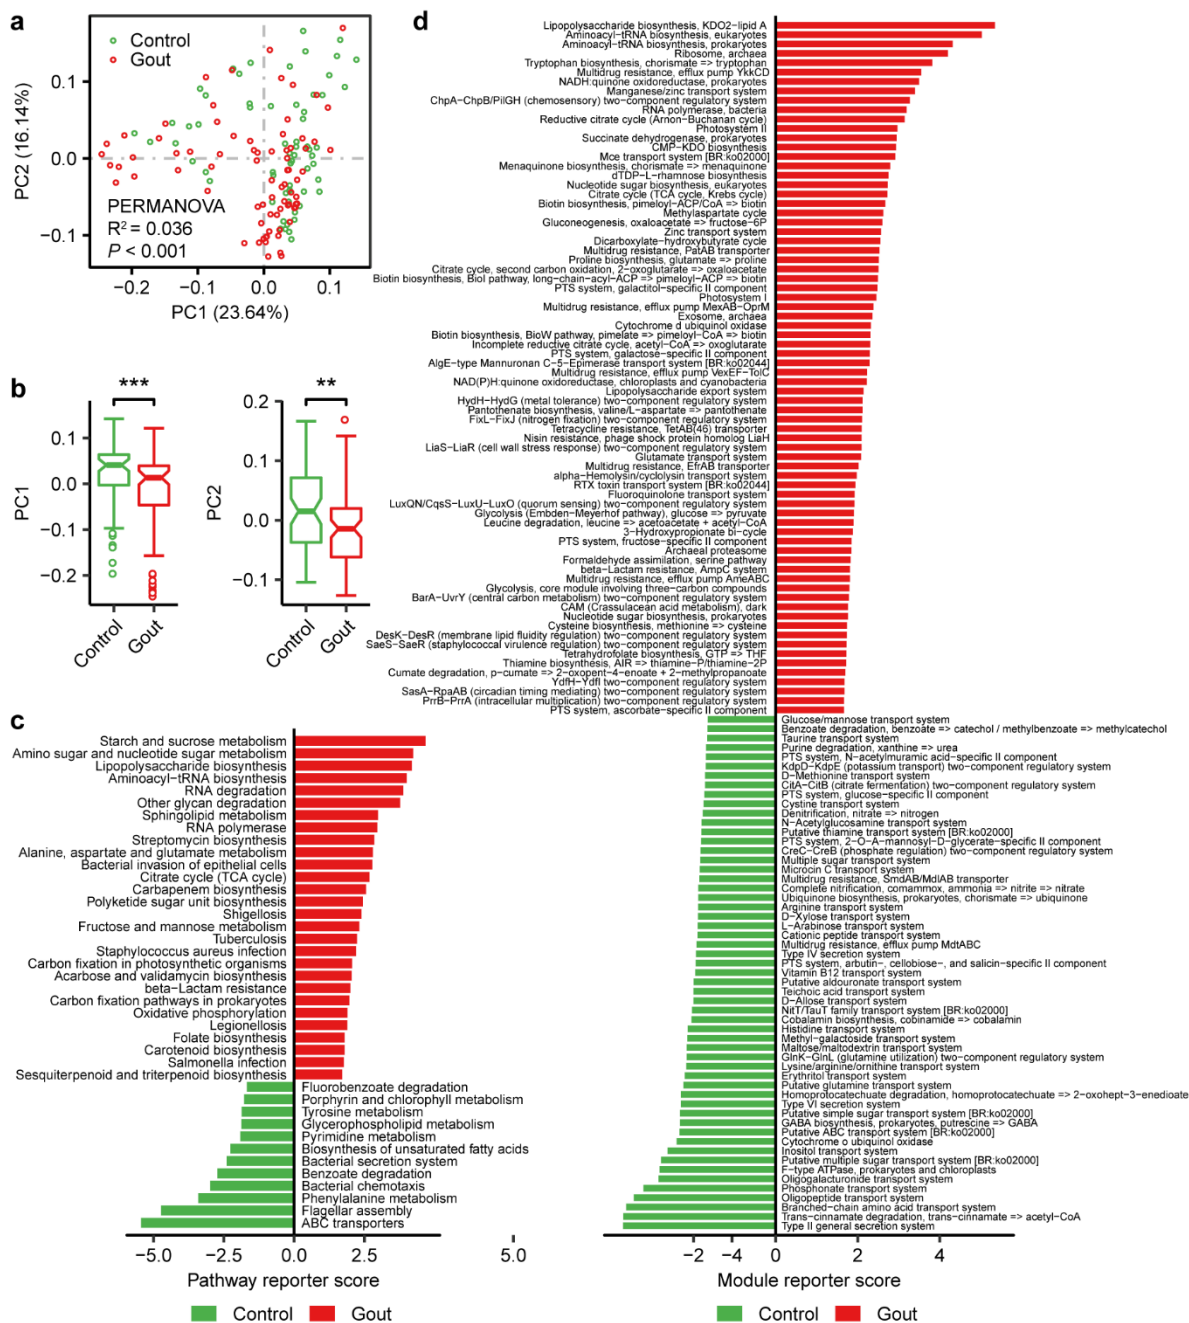

82

83 **Supplementary Figure 5.** Gut microbial gene functions between healthy controls and gout  
 84 patients in discovery cohort. **(a)** PCA based on the KOs relative abundance profile (green,  
 85 healthy control, n = 63; red, gout patient, n = 77). PERMANOVA calculation based on the  
 86 Bray-Curtis distance. **(b)** The distribution of healthy controls and gout patients along PC1 and  
 87 PC2 were shown on the boxes and whisker plots. Healthy controls were significantly different  
 88 from gout patients based on Wilcoxon rank-sum test (\*\*,  $P < 0.01$ ; \*\*\*,  $P < 0.001$ ). **(c, d)**  
 89 Different pathways or modules in healthy controls and gout patients. Pathways or modules  
 90 were shown if reporter score  $> 1.65$  or  $< -1.65$ . Green, enriched in healthy controls; red,  
 91 enriched in gout patients. For all box and whisker plots, the center line represents median. The



92 bounds of box represent the first and third quartiles. The upper whisker extends from the hinge  
93 to the largest value no further than  $1.5 * \text{interquartile range (IQR)}$  from the hinge. The lower  
94 whisker extends from the hinge to the smallest value at most  $1.5 * \text{IQR}$  of the hinge. The notch  
95 represents a confidence interval around the median as the median  $\pm 1.58 * \text{IQR} / \sqrt{n}$ .  
96

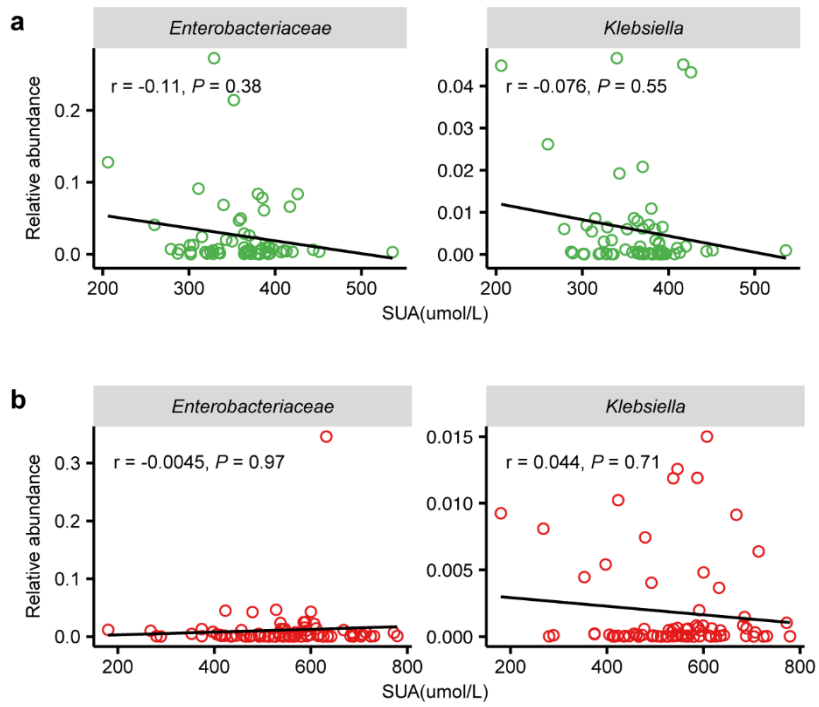

97

98 **Supplementary Figure 6.** The associations for Enterobacteriaceae and Klebsiella with SUA

99 within gout patients and healthy controls.

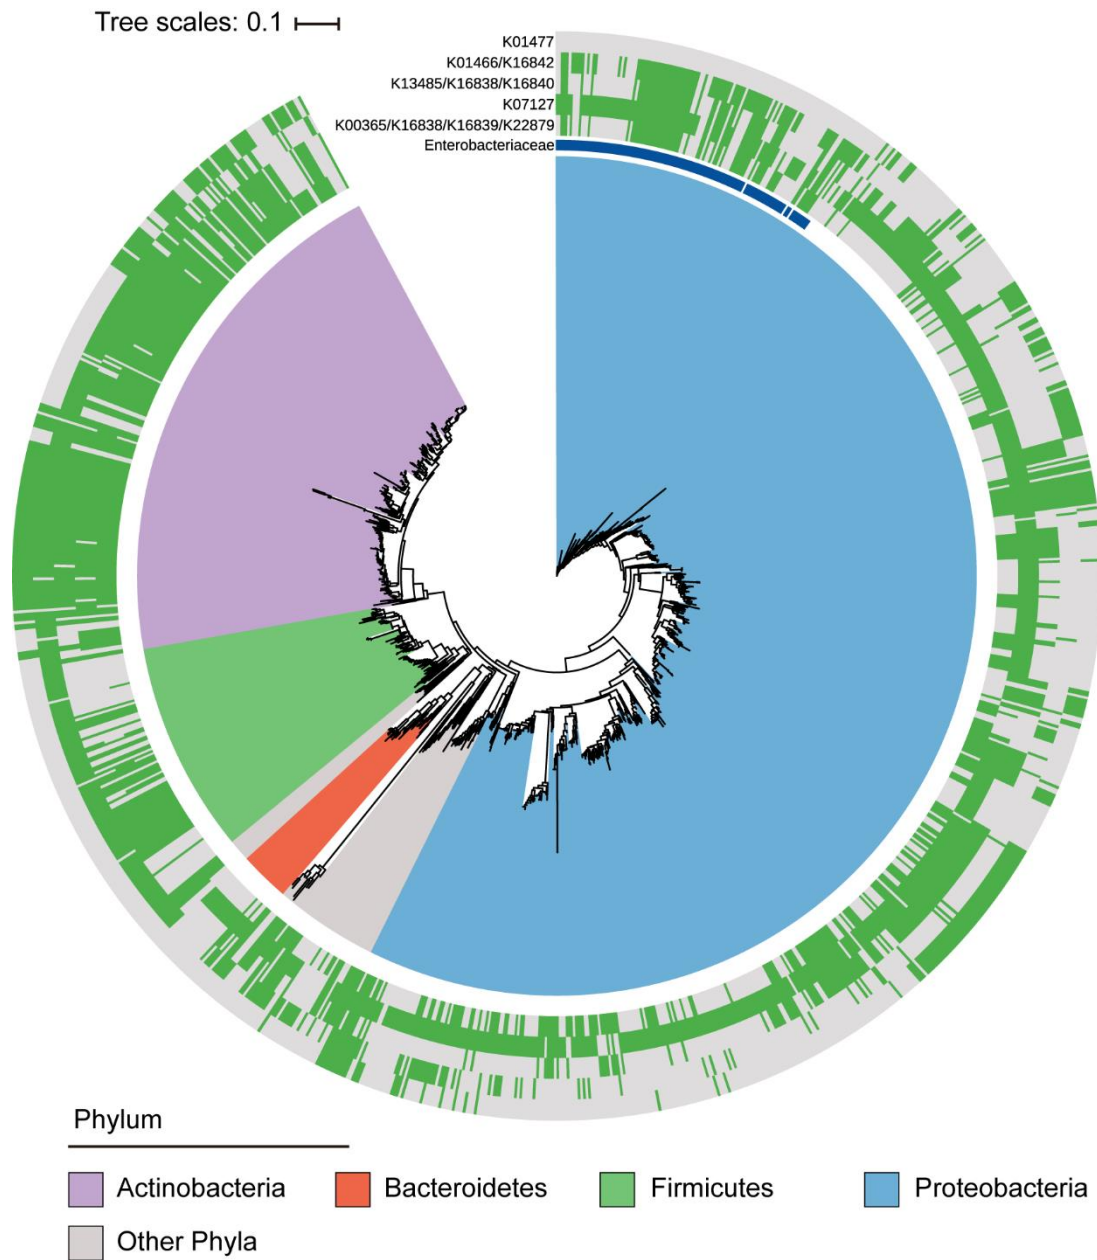

101

102 **Supplementary Figure 7.** Urate degradation gene in bacteria. The tree represents 1,135

103 species which contain at least one urate degradation gene in KEGG database (v79). Species

104 belonging to *Enterobacteriaceae* were labeled in the middle ring. Green color in the out ring

105 denotes the presence of the genes in the species alongside the tree.

106

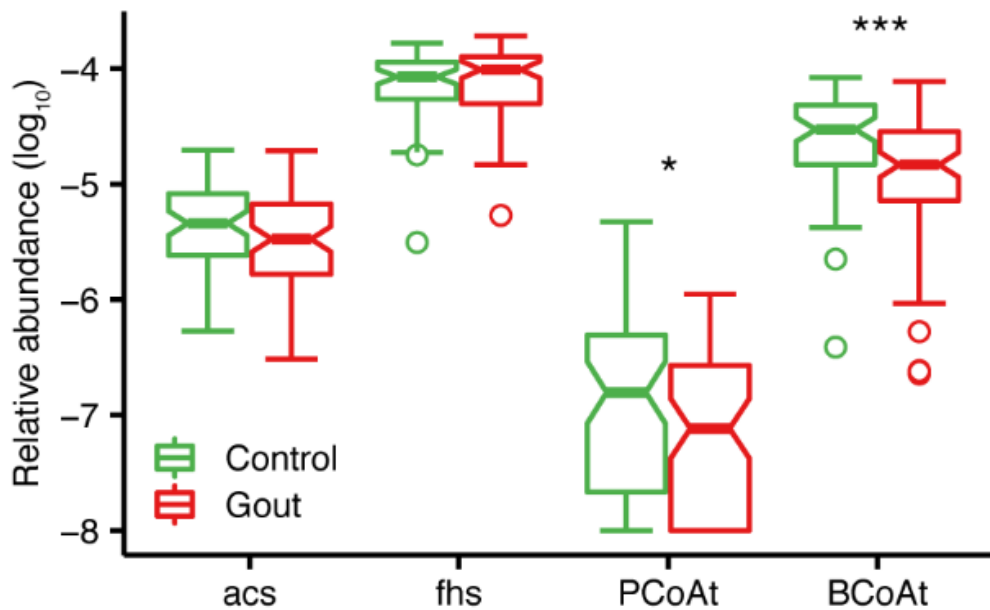

107

108 **Supplementary Figure 8.** Relative abundance of genes related to acetate, propionate and  
 109 butyrate in healthy controls and gout patients. Wilcoxon rank-sum test was used to determine  
 110 significance, '\*' denotes  $P < 0.05$ ; '\*\*' denotes  $P < 0.01$ ; '\*\*\*' denotes  $P < 0.001$ . Abbreviation:  
 111 acs, O dehydrogenase/acetyl-CoA synthase complex; fhs, formate-tetrahydrofolate ligase;  
 112 PCoAt, propionate CoA-transferase/propionyl-CoA:succinate-CoA transferase; BCoAt,  
 113 butyryl-CoA transferase. For all box and whisker plots, the center line represents median. The  
 114 bounds of box represent the first and third quartiles. The upper whisker extends from the hinge  
 115 to the largest value no further than  $1.5 * \text{interquartile range (IQR)}$  from the hinge. The lower  
 116 whisker extends from the hinge to the smallest value at most  $1.5 * \text{IQR}$  of the hinge. The notch  
 117 represents a confidence interval around the median as the median  $\pm 1.58 * \text{IQR} / \sqrt{n}$ .

118

119

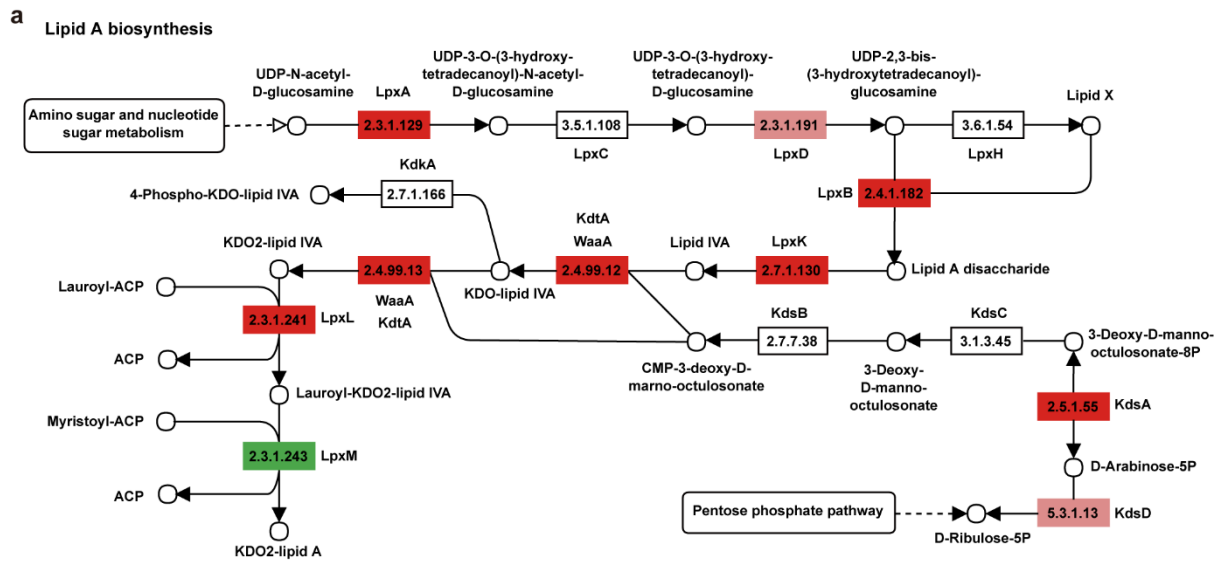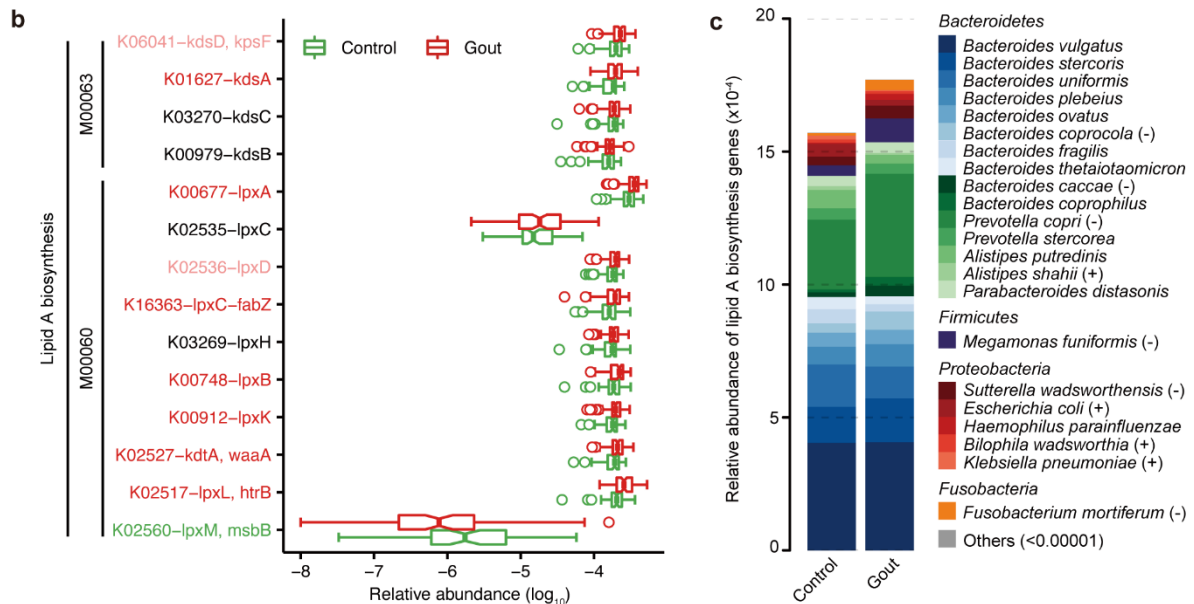

120

121 **Supplementary Figure 9.** Gout-associated microbial genes related to lipid A biosynthesis. **(a)**

122 Module for lipid A biosynthesis. **(b)** Relative abundance of KOs involved in lipid A

123 biosynthesis. Significantly enriched KOs were identified by Wilcoxon rank-sum test and the

124 boxes or KO names were colored according to the direction of enrichment. Green and light

125 green, enriched in healthy control (Green, FDR < 0.05; light green,  $P < 0.05$ ); Red and light

126 red, enriched in gout patients (Red, FDR < 0.05; light red,  $P < 0.05$ ); Boxes with no color or

127 KO names with black, no difference; Boxes with grey, not detected in samples. **(c)**

128 Contributions of species to lipid A biosynthesis. Species with mean relative abundance more

129 than 0.00001 in the patient or healthy control group were shown. Species with significantly

130 different relative abundance were marked with '+' or '-' ( $P < 0.05$ ), which was also

131 corresponding to healthy control-enriched or gout patient-enriched, respectively. For all box

132 and whisker plots, the center line represents median. The bounds of box represent the first and  
133 third quartiles. The upper whisker extends from the hinge to the largest value no further than  
134  $1.5 * \text{interquartile range (IQR)}$  from the hinge. The lower whisker extends from the hinge to  
135 the smallest value at most  $1.5 * \text{IQR}$  of the hinge. The notch represents a confidence interval  
136 around the median as the median  $\pm 1.58 * \text{IQR} / \sqrt{n}$ . Abbreviations: kdsD, kpsF, arabinose-  
137 5-phosphate isomerase; kdsA, 2-dehydro-3-deoxyphosphooctonate aldolase; kdsC, 3-deoxy-  
138 D-manno-octulosonate 8-phosphate phosphatase; kdsB, 3-deoxy-manno-octulosonate  
139 cytidyltransferase; lpxA, UDP-N-acetylglucosamine acyltransferase; lpxC, UDP-3-O-[3-  
140 hydroxymyristoyl] N-acetylglucosamine deacetylase; lpxD, UDP-3-O-[3-hydroxymyristoyl]  
141 glucosamine N-acyltransferase; lpxC-fabZ, UDP-3-O-[3-hydroxymyristoyl] N-  
142 acetylglucosamine deacetylase / 3-hydroxyacyl-[acyl-carrier-protein] dehydratase; lpxH,  
143 UDP-2,3-diacetylglucosamine hydrolase; lpxB, lipid-A-disaccharide synthase; lpxK,  
144 tetraacyldisaccharide 4'-kinase; kdtA, waaA, 3-deoxy-D-manno-octulosonic-acid transferase;  
145 lpxL, trB, Kdo2-lipid IVA lauroyltransferase; lpxM, sbB, lauroyl-Kdo2-lipid IVA  
146 myristoyltransferase.

147

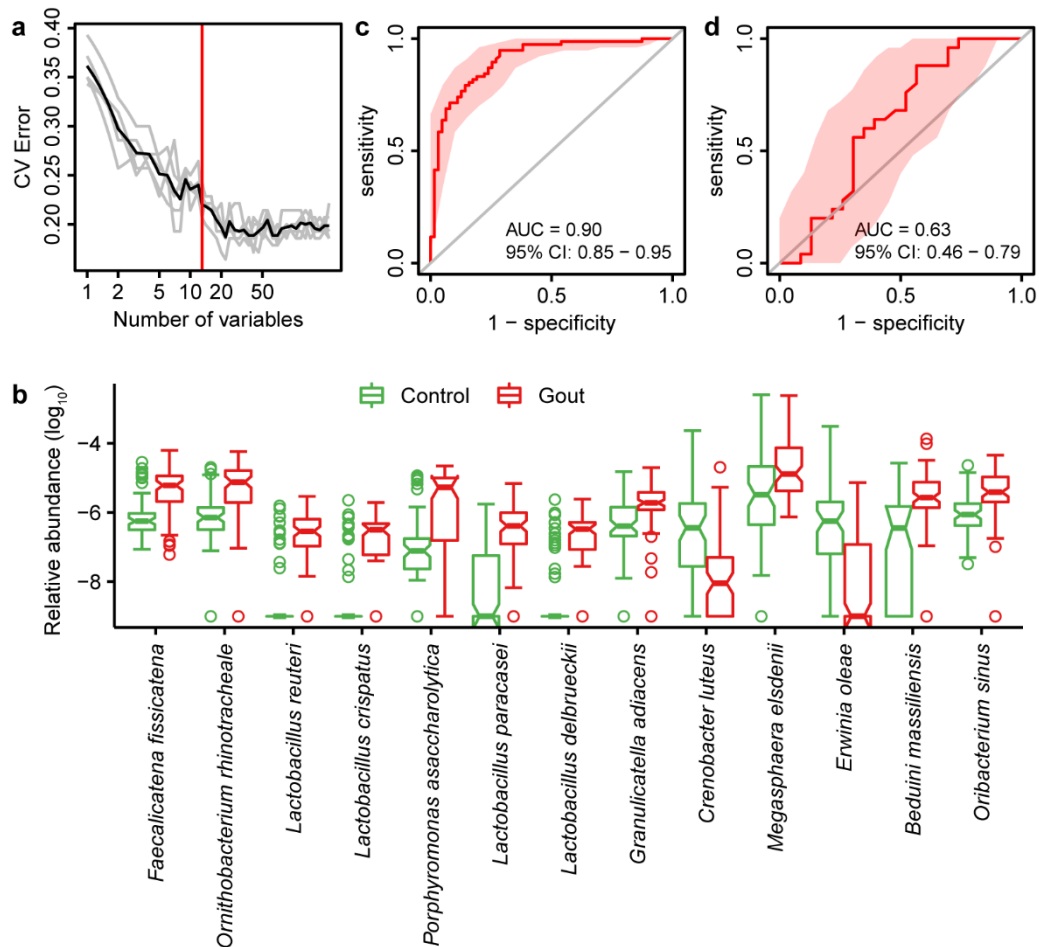

148

149 **Supplementary Figure 10.** Classification of gout by relative abundance of bacterial species.

150 **(a)** Distribution of 5 trials of 10-fold cross-validation error in random forest classification of  
 151 gout as the number of gene increases. The model was trained using the relative abundance of  
 152 the genes in discovery cohort. The black curve indicates the average error of the five trials  
 153 (gray lines). The red line marks the number of gene in the optimal set. **(b)** Relative abundance  
 154 of 13 bacterial species markers in discovery cohorts. **(c)** Receiver operating curve (ROC) for  
 155 the discovery samples. **(d)** ROC for the validation samples (healthy control,  $n = 23$ ; gout patient,  
 156  $n = 25$ ). For all box and whisker plots, the center line represents median. The bounds of box  
 157 represent the first and third quartiles. The upper whisker extends from the hinge to the largest  
 158 value no further than  $1.5 \times$  interquartile range (IQR) from the hinge. The lower whisker extends  
 159 from the hinge to the smallest value at most  $1.5 \times$  IQR of the hinge. The notch represents a  
 160 confidence interval around the median as the median  $\pm 1.58 \times \text{IQR} / \sqrt{n}$ .

161

162

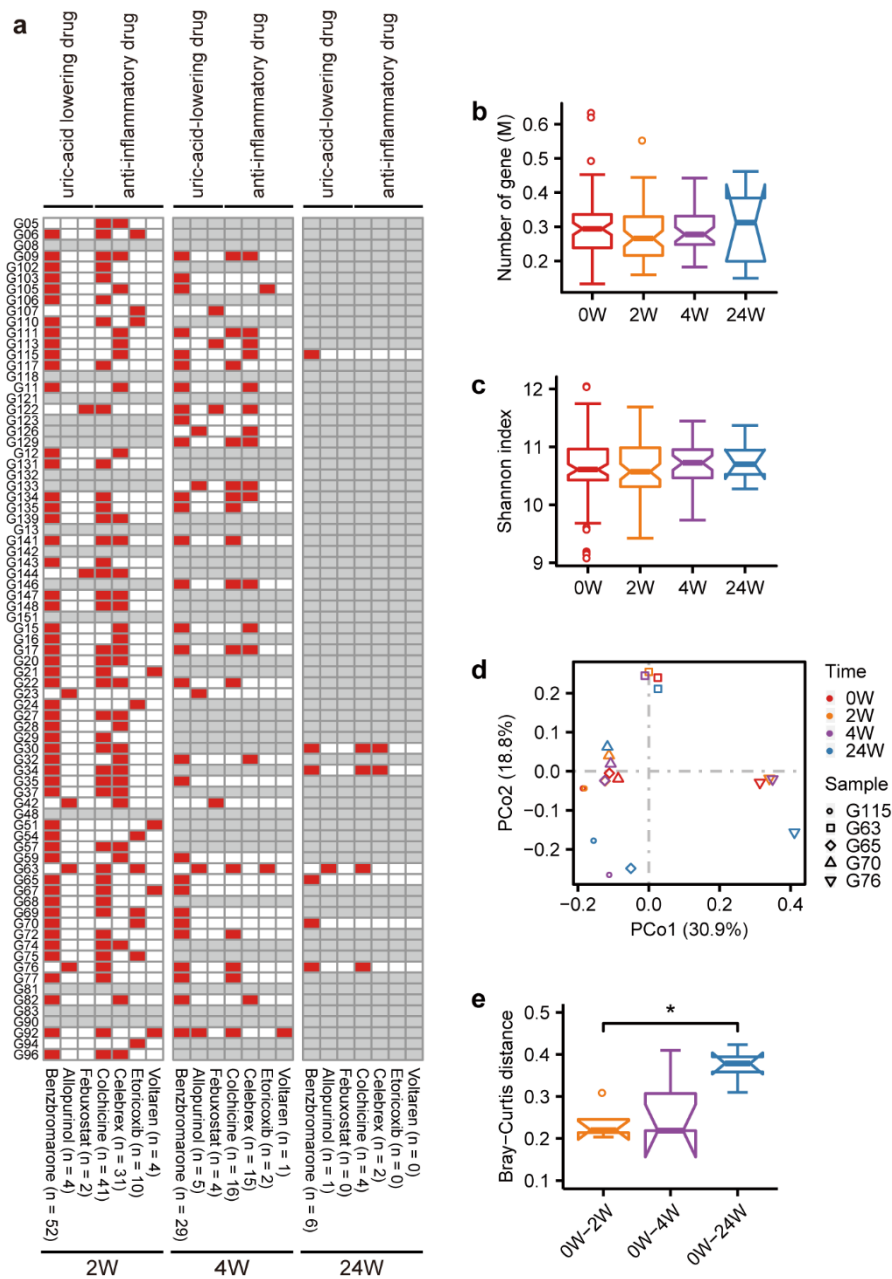

163

164

**Supplementary Figure 11.** Alteration of gut microbiota by therapeutic intervention in gout.

165

**(a)** Medication and sample collection at different time points of 77 gout patients (2W, n = 61;

166

4W, n = 38; 24W, n = 7). Rows and columns represent individuals and drugs, respectively. Red

167

and white color denote individuals using drugs or not, and gray denotes fecal samples that were

168

not collected for metagenomics sequencing. **(b, c)** Box and whisker plot of gene count (B) and

169

alpha-diversity (Shannon index) (C) in gout patients before and after treatment. **(d)** PCoA based

170

on Bray-Curtis distance at gene level of 5 gout patients whose fecal samples were collected at

171

four time points. **(e)** Box and whisker plot of Beta diversity between before and after treatment

172

of 5 gout patients. Wilcoxon rank-sum test: ‘\*’ denotes  $P < 0.05$ . For all box and whisker plots,

173

the center line represents median. The bounds of box represent the first and third quartiles. The



174 upper whisker extends from the hinge to the largest value no further than  $1.5 * \text{interquartile}$   
175 range (IQR) from the hinge. The lower whisker extends from the hinge to the smallest value at  
176 most  $1.5 * \text{IQR}$  of the hinge. The notch represents a confidence interval around the median as  
177 the median  $\pm 1.58 * \text{IQR} / \sqrt{n}$ .  
178

179

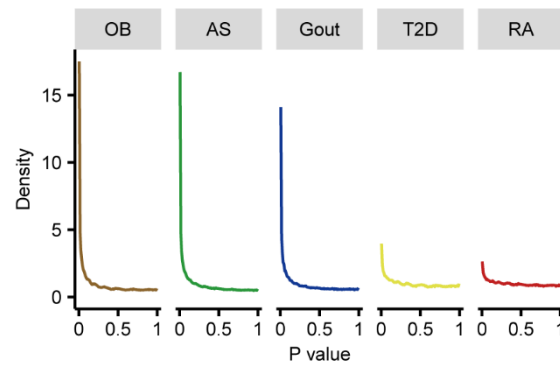

180

181 **Supplementary Figure 12.** The distribution of  $P$ -values for the differential genes in gout  
182 cohort in the presented study as well as four additional public case-control metagenomic  
183 datasets. Sample size of OB, AS, T2D and RA was the same as gout with 63 healthy controls  
184 and 77 patients, respectively.

185



189 gout, OB, RA and T2D. Purple, enriched in healthy controls; red, enriched in patients. **(b)**  
190 Comparison of microbial gene functions in AS, gout, OB, RA and T2D. Purple, enriched in  
191 healthy controls; red, enriched in patients. '\*' denotes reporter score of pathways  $> 1.65$  or  $< -$   
192  $1.65$ .  
193

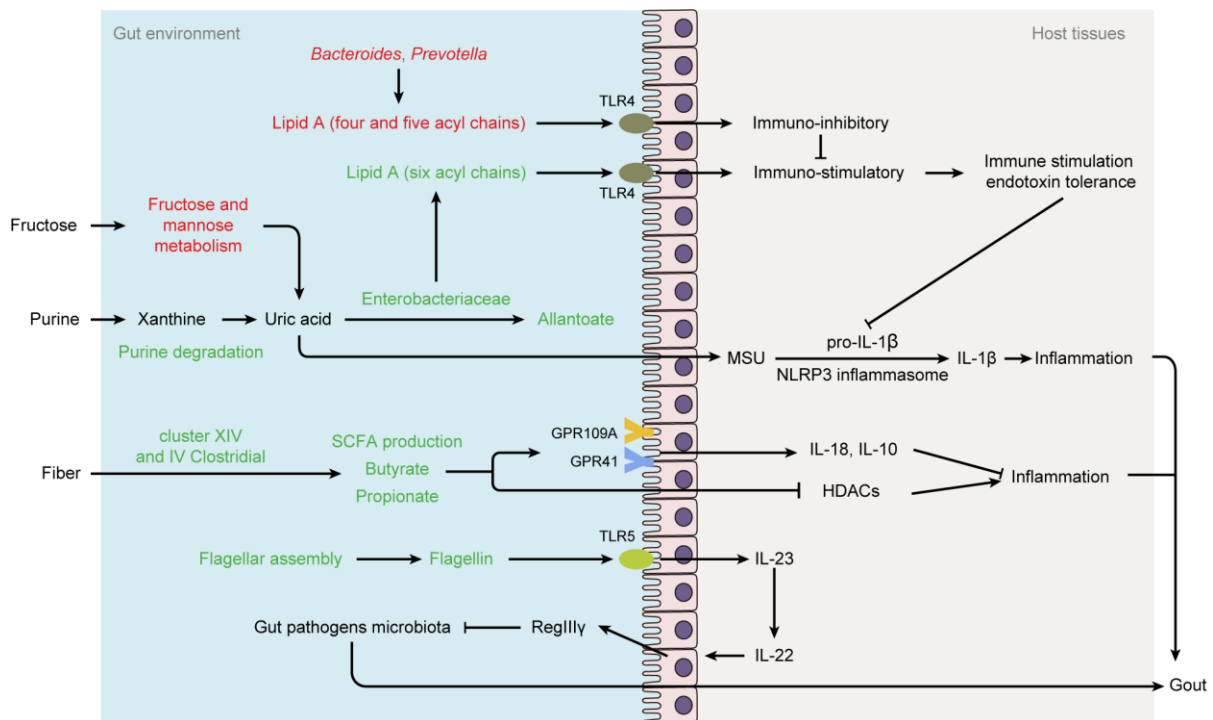

194

195 **Supplementary Figure 14.** A hypothetical model of gut microbes influencing the development

196 of gout based on the findings of the presented study. Green text denotes depleted species or

197 functions in gout patients; red text denotes enriched species or functions in gout patients.

198 Abbreviation: MSU, monosodium urate; TLR4, Toll-like receptor 4; TLR5, Toll-like receptor

199 5; GPR41, G protein-coupled receptor 41; GPR109A, G protein-coupled receptor 109A; HDAC,

200 histone deacetylases; Th17, T-helper 17 cells; IL-1 $\beta$ , interleukin-1 $\beta$ ; IL-23, interleukin-23; IL-

201 22, interleukin-22.

202
